# Supplementary material
Source: PubMed Central journal article supplement (PMC7680407)

# Supplemental Figure 1

## Study 1

○ responders  
 ■ non responders

### LH/FSH

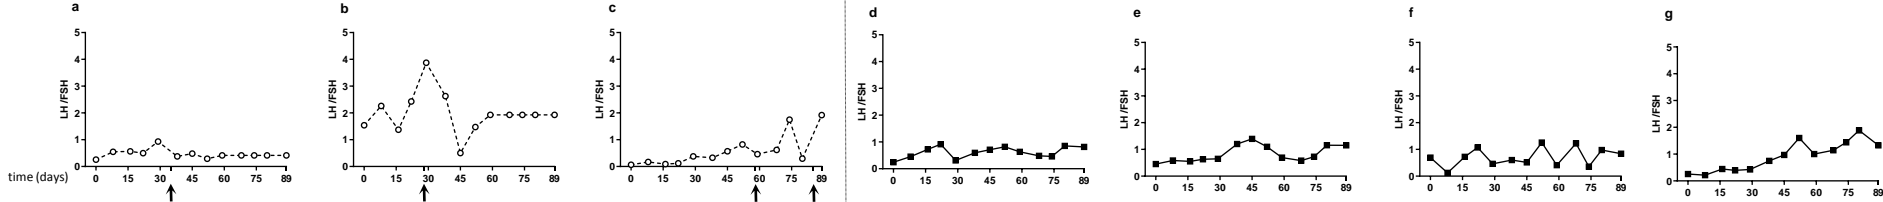

### E2

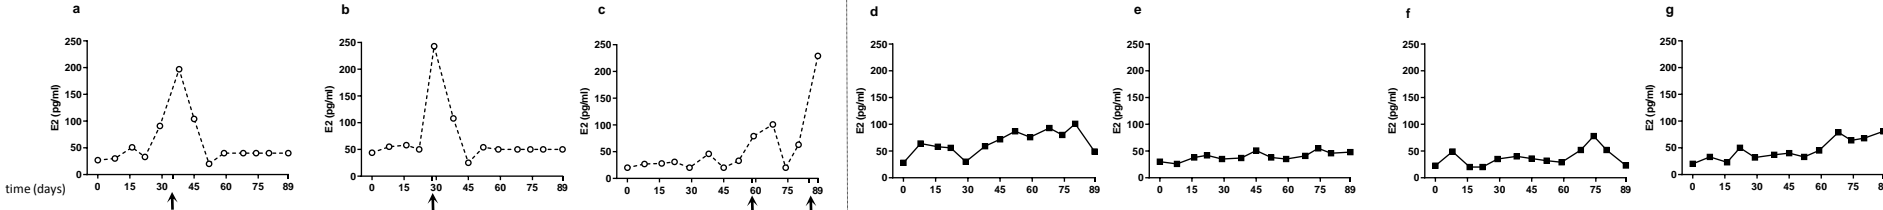

### Inhibin A

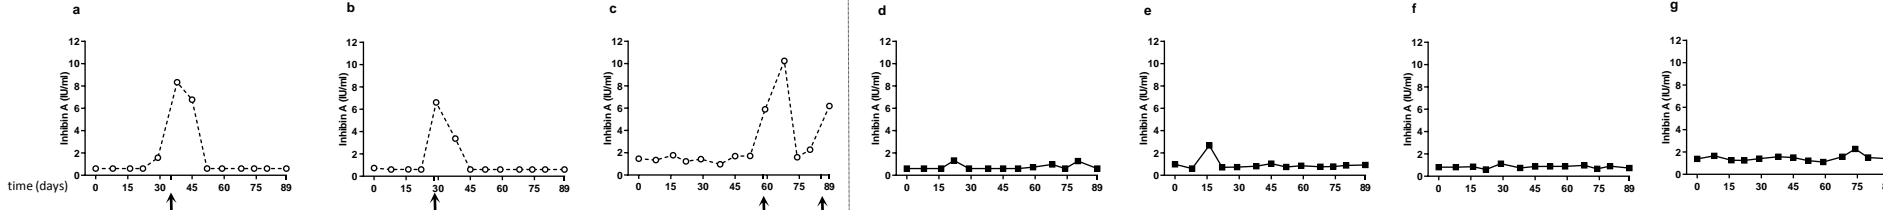

Supplement: NIHMS1636525-supplement-1.pdf [file NIHMS1636525-supplement-1.pdf]

# Supplemental Figure 2

## Study 2

○ responders  
 ■ non responders

### LH/FSH

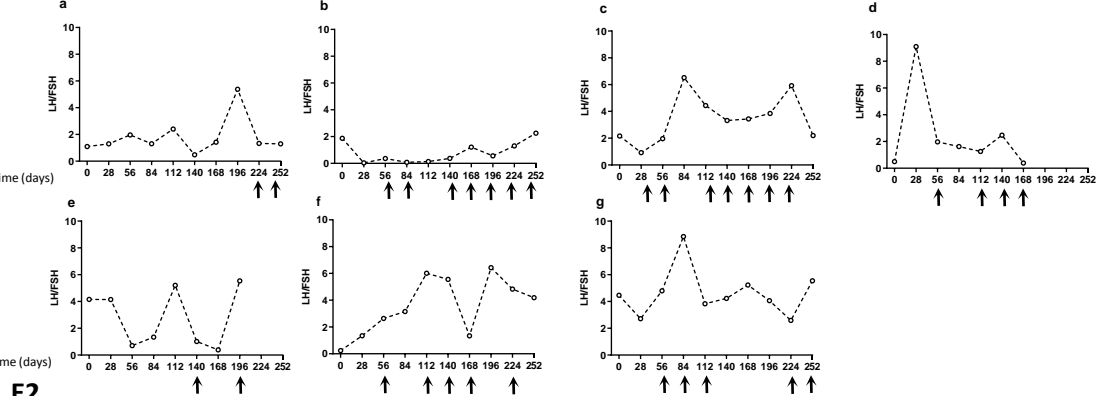

### E2

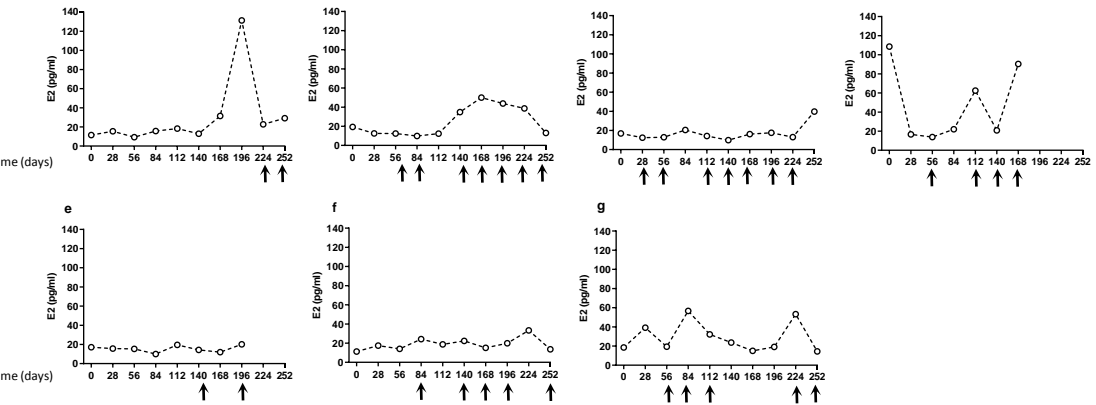

### Inhibin A

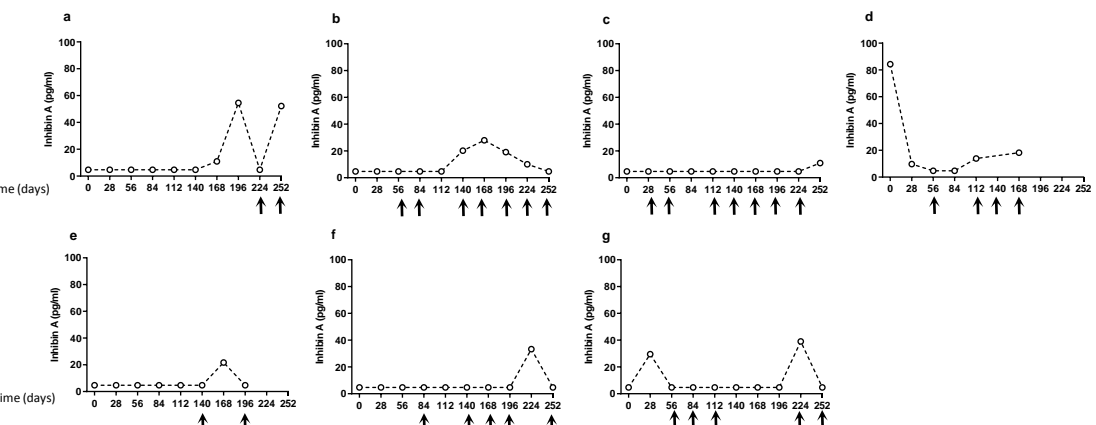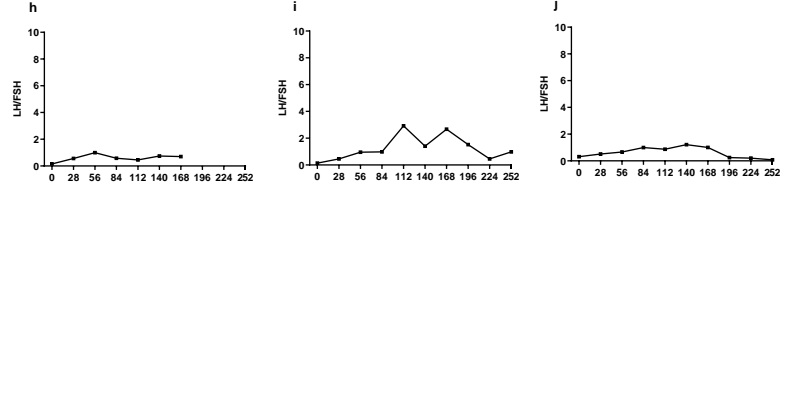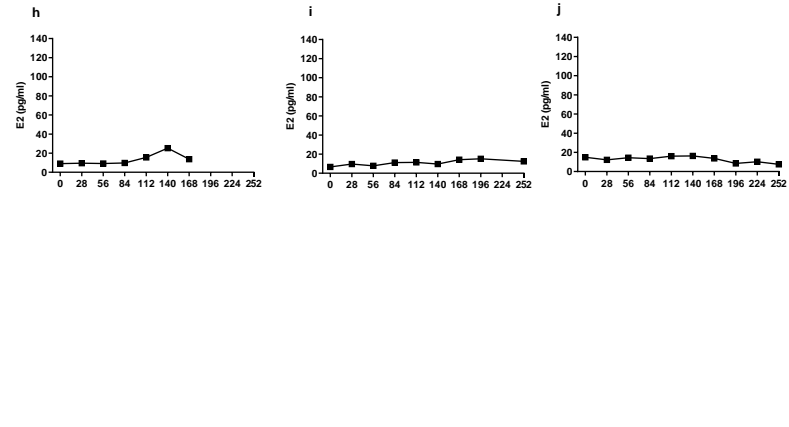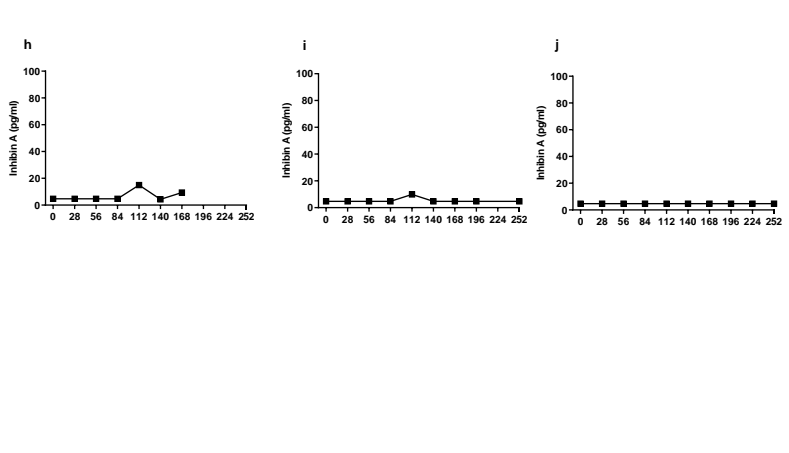

Supplement: NIHMS1636525-supplement-2.pdf [file NIHMS1636525-supplement-2.pdf]
